# Supplementary material for: Enigmatic Fe-Mn-fueled Anaerobic Oxidation of Methane in sulfidic coastal sediments of the Eastern Arabian Sea
Source: Copernicus journal article supplement (doi:10.5194/egusphere-2024-1829), 2024-07-01
Supplement: Supplementary file 1 [file egusphere-2024-1829-supplement.pdf]

1 ***Supplement of***

2 **Enigmatic Fe-Mn fueled Anaerobic Oxidation of Methane in sulfidic coastal**  
3 **sediments of the Eastern Arabian Sea**

4 Kalyani Sivan<sup>1,2</sup>, Aditya Peketi<sup>1,2</sup>, Aninda Mazumdar<sup>1,2\*</sup>, Anjali Zatale<sup>1,2</sup>, Sai Pavan Kumar  
5 Pillutla<sup>2,3</sup>, Ankita Ghosh<sup>1,2</sup>, Mohd Sadique<sup>2,3</sup>, Jittu Mathai<sup>2</sup>

6 <sup>1</sup>*Academy of Scientific and Innovative Research (AcSIR), Ghaziabad-201002, India*

7 <sup>2</sup>*Gas hydrate Research Group, CSIR-National Institute of Oceanography, Dona Paula,*

8 *Goa-403004, India*

9 <sup>3</sup>*School of Earth, Ocean, and Atmospheric Sciences, Goa University, Taleigao Plateau,*

10 *Goa- 403206, India*

11 *Correspondence to: Dr. Aninda Mazumdar (maninda@nio.org)*

12 **This PDF file includes:**

13

14 Supporting text

15 Figures S1 & S2

16 Tables S1 to S3

17 References

18

19

20

21

22

## 23 **Supporting Information Text**

### 24 **Geological setting and Hydrography**

25 The western continental margin of India is a passive NNW-SSE margin with a shelf break at  
26 140-180m depth. The Western Continental Shelf of India (WCSI) covers an area of  $0.3 \times 10^6$   
27  $\text{km}^2$  and gently slopes to the west with a gradient of 1:400 to 1:3000 to a water depth of 140 m  
28 (Wagle et al., 1994). The inner shelf has a smooth and gently sloping topography with a gradient  
29 of 1:700 to 1:3300 and is characterized by organic carbon-rich silt and clay up to a water depth  
30 of 50 m. The mid shelf shows uneven topography and predominantly composed of calcareous  
31 oolitic sand (Nair et al., 1978). The outer shelf is composed of relict carbonate sediments,  
32 phosphatic limestone micronodules (Rao and Nair, 1988), low organic matter coarse sands, and  
33 high carbonates (Rao and Wagle, 1977). The width of the continental shelf varies significantly,  
34 spanning from 345 km off Daman to 100 km in northern Kutch, tapering to 120 km off Goa,  
35 and 60 km off Quilon in Kerala (Rao and Wagle, 1977). Previous studies (Siddiquie et al., 1981,  
36 Karisiddaiah et al., 2002) have identified gas-charged sediments along the WCSI. The  
37 sediments in the continental shelf off Goa are characterized by high iron content due to large  
38 input of Fe oxyhydroxides in the shelf via Mandovi and Zuari estuaries, as a result of iron ore  
39 mining and processing along the West coast of India (Sebastian et al., 2017). The sedimentation  
40 rates reported from WCSI (off Goa) within a water depth of 40 m vary from 0.15 to 1.57 cm/yr  
41 (Nigam et al., 1995; Kurian et al., 2009; Mazumdar et al., 2012; Sebastian et al., 2017;  
42 Fernandes et al., 2020).

43 The WCSI experiences suboxia and denitrification over the inner and mid-shelf during and  
44 immediately after the southwest monsoon due to the strong upwelling of cold, nutrient-rich  
45 oxygen-deficient water from the south (Naqvi et al., 2000). The high primary productivity due  
46 to enhanced nutrient availability and subsequent respiration of excess organic matter leads to  
47 oxygen drawdown, resulting in hypoxia formation. This in conjunction with shallow

48 thermohaline stratification, developed due to high rainfall (3000 mm) in the coastal zone and  
49 adjoining areas of Western Ghats further intensifies bottom water hypoxia. This seasonal  
50 hypoxic zone covers an area of 0.18 million sq. km and is the largest among all coastal hypoxic  
51 systems (Naqvi et al., 2000; Naqvi et al., 2006).

## 52 **Supporting Figures**

### 53 **S1: Dissolved sulfide and iron in porewaters**

54 Figure S1 shows the cross plot of dissolved iron (Fe) vs sulfide in porewaters reported from  
55 Fe-Mn-AOM zones in marine sediments and the present study. Previous studies have indicated  
56 that Fe<sup>2+</sup> enrichment during Fe-AOM is typically confined to the methanogenic zone or below  
57 the sulfidization front, where Fe<sup>2+</sup> accumulation in porewater is favored due to the absence of  
58 sulfide. The precipitation of iron monosulfide and pyrite from dissolved sulfide and iron  
59 suppresses and masks signatures of Fe (III)-driven AOM (Riedinger et al., 2014; Egger et al.,  
60 2015a; Egger et al., 2015b; Egger et al., 2016a; Egger et al., 2016b; Egger et al., 2017;  
61 Aromokeye et al., 2019; Luo et al., 2020). However, in the present study, high porewater sulfide  
62 concentrations (3.3 to 10.38 mM) are observed throughout the core, despite high dissolved Fe<sup>2+</sup>  
63 concentrations. A similar observation was also reported by a previous study (Li et al., 2019).  
64 The accumulation of ferrous iron in the presence of high sulfide concentrations in the porewater  
65 possibly indicates a greater rate of Fe<sup>2+</sup>-Mn<sup>2+</sup> generation compared to their consumption via  
66 sulfidization (FeS/FeS<sub>2</sub>; Hensen et al., 2003).

67

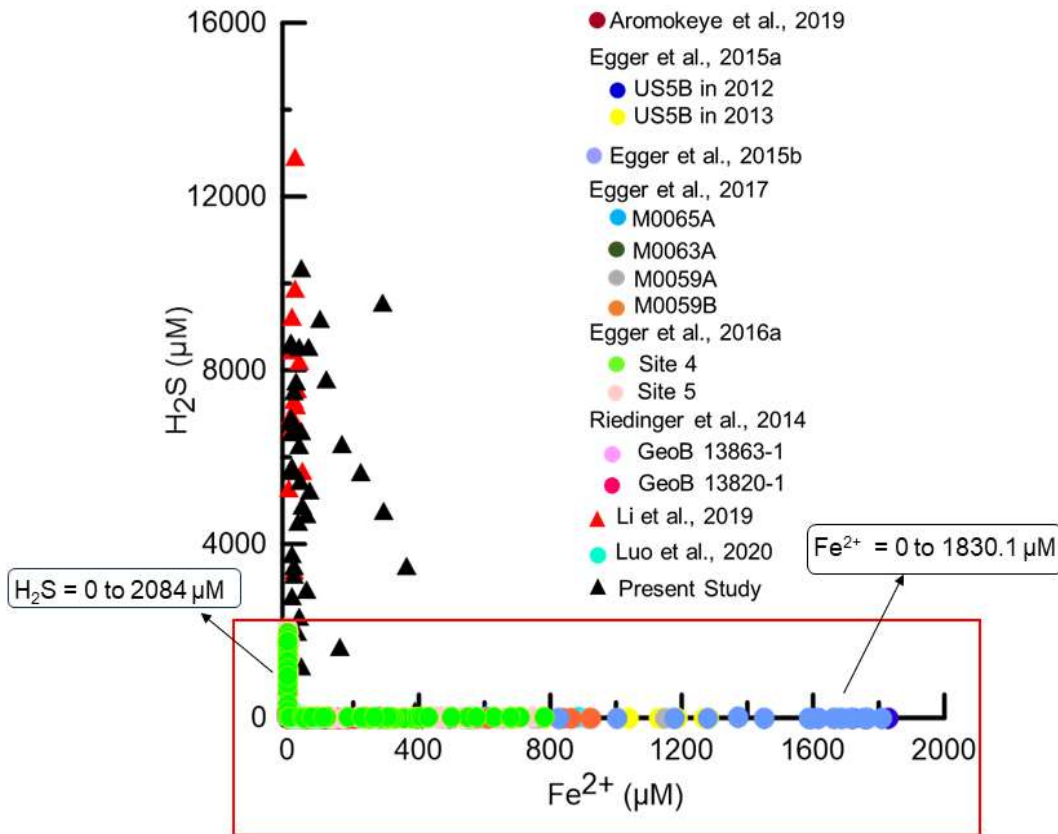

68

69

70 **Figure S1.** Cross plot of porewater  $\text{Fe}^{2+}$  and  $\text{HS}^-$  concentrations reported from Fe-Mn-AOM zones in  
 71 marine sediments (Riedinger et al., 2014; Egger et al., 2015a; Egger et al., 2015b; Egger et al., 2016a;  
 72 Egger et al., 2017; Aromokeye et al., 2019; Luo et al., 2020) and present study. The red rectangle  
 73 represents very low  $\text{H}_2\text{S}$  and  $\text{Fe}^{2+}$  values.

74 **S2: Sedimentary TOC, TOC/TN,  $\delta^{13}\text{C}_{\text{TOC}}$ , and  $\delta^{15}\text{N}_{\text{TN}}$  values**

75 Figure S2 shows downcore records of TOC, TOC/TN,  $\delta^{13}\text{C}_{\text{TOC}}$ , and  $\delta^{15}\text{N}_{\text{TN}}$ . The clay-silt-rich  
 76 sediment core (SSD070/7/GC6) exhibits a gradual decline in TOC content (from 26 mg/g to  
 77 1.45 mg/g) with depth below the seafloor (Table S2). The TOC/TN molar ratios range from 3.5  
 78 to 27.3 (avg.:  $14.5 \pm 3.5$ ). Interestingly, the  $\delta^{13}\text{C}_{\text{TOC}}$  and  $\delta^{15}\text{N}_{\text{TN}}$  profiles show significant  
 79 variation throughout the core with values ranging from -20.693 to -25.934 ‰ and -3.3 to 7.7  
 80 ‰ respectively. The downcore marked variation in TOC, TOC/TN,  $\delta^{13}\text{C}_{\text{TOC}}$ , and  $\delta^{15}\text{N}_{\text{TN}}$

81 indicates significant variation in terrestrial and marine organic matter input, denitrification and  
82 nitrogen fixation in the study area. Moreover, the  $\delta^{13}\text{C}_{\text{TOC}}$  profile in the present and previous  
83 studies (Mazumdar et al., 2012; Fernandes et al., 2020) also shows an overall depletion trend  
84 with depth indicating more organic matter contribution from terrestrial influx. These variations  
85 reflect the complex and dynamic nature of biogeochemical processes and organic matter  
86 sources in the coastal waters of the WCSI.

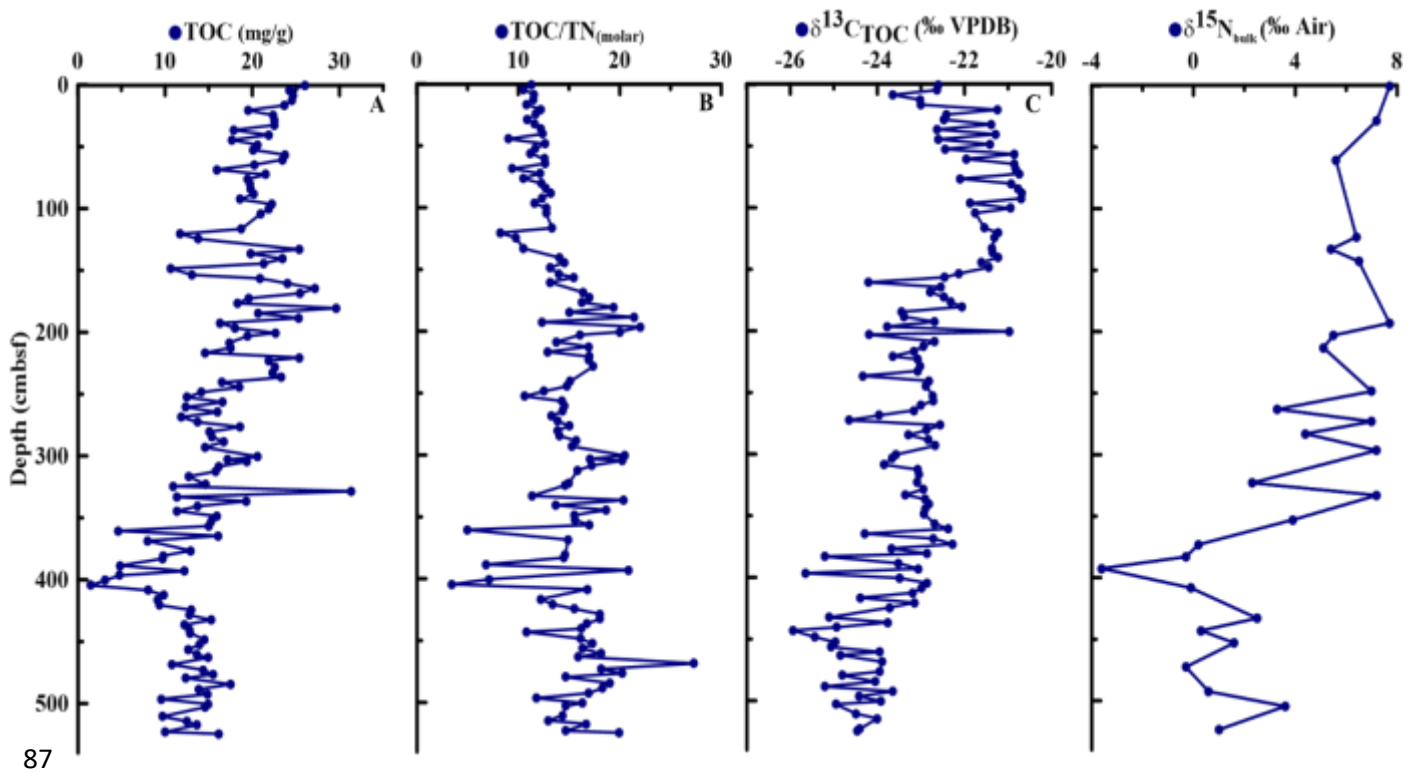

88 **Figure S2.** Vertical profiles of sedimentary a) TOC (in mg/g), b) TOC/TN<sub>(molar)</sub>, c)  $\delta^{13}\text{C}_{\text{TOC}}$  (‰ VPDB),  
89 and d)  $\delta^{15}\text{N}$  (‰ Air) in the studied sediment core (SSD070/7/GC6).

90

91

92

93

94 **Table S1. Porewater concentrations and carbon isotope ratio of methane ( $\delta^{13}\text{C}_{\text{CH}_4}$ ) and**  
 95 **DIC ( $\delta^{13}\text{C}_{\text{DIC}}$ ) in the studied core (SSD070/7/GC6). bdl= below detection limit, na= not**  
 96 **analyzed.**

97

| <b>Depth<br/>(cmbsf)</b> | <b>SO<sub>4</sub><sup>2-</sup><br/>(mM)</b> | <b>H<sub>2</sub>S<br/>(<math>\mu\text{M}</math>)</b> | <b>CH<sub>4</sub><br/>(<math>\mu\text{M}</math>)</b> | <b><math>\delta^{13}\text{C}_{\text{CH}_4}</math><br/>(‰ VPDB)</b> | <b>DIC<br/>(mM)</b> | <b><math>\delta^{13}\text{C}_{\text{DIC}}</math><br/>(‰ VPDB)</b> | <b>Fe<br/>(<math>\mu\text{M}</math>)</b> | <b>Mn<br/>(<math>\mu\text{M}</math>)</b> |
|--------------------------|---------------------------------------------|------------------------------------------------------|------------------------------------------------------|--------------------------------------------------------------------|---------------------|-------------------------------------------------------------------|------------------------------------------|------------------------------------------|
| 1                        | 26.42                                       | 0.00                                                 | bdl                                                  | bdl                                                                | 3.52                | -9.60                                                             | 129.59                                   | 24.90                                    |
| 8                        | 25.29                                       | 0.00                                                 | bdl                                                  | bdl                                                                | 4.81                | -11.28                                                            | na                                       | na                                       |
| 16                       | na                                          | na                                                   | bdl                                                  | bdl                                                                | 5.80                | -13.23                                                            | 48.56                                    | 17.37                                    |
| 23                       | 23.30                                       | 0.00                                                 | bdl                                                  | bdl                                                                | 5.97                | -14.17                                                            | 44.73                                    | 17.92                                    |
| 33                       | 22.80                                       | 0.00                                                 | bdl                                                  | bdl                                                                | na                  | na                                                                | 33.84                                    | 18.26                                    |
| 43                       | 21.67                                       | 0.00                                                 | bdl                                                  | bdl                                                                | 8.46                | -9.78                                                             | 9.05                                     | 9.08                                     |
| 53                       | 19.59                                       | 0.00                                                 | bdl                                                  | bdl                                                                | 8.11                | -20.69                                                            | 19.26                                    | 4.40                                     |
| 63                       | 18.18                                       | 3300.97                                              | bdl                                                  | bdl                                                                | 8.08                | -22.87                                                            | 14.15                                    | 1.29                                     |
| 73                       | 16.45                                       | 3756.29                                              | bdl                                                  | bdl                                                                | 8.16                | -24.90                                                            | 67.52                                    | 4.48                                     |
| 93                       | 12.83                                       | 6595.17                                              | bdl                                                  | bdl                                                                | 8.76                | -27.13                                                            | 41.51                                    | 1.08                                     |
| 103                      | 11.88                                       | 5451.93                                              | bdl                                                  | bdl                                                                | 8.34                | -27.84                                                            | 40.17                                    | 1.62                                     |
| 113                      | 10.87                                       | 7791.28                                              | bdl                                                  | bdl                                                                | 8.48                | -30.40                                                            | 116.47                                   | 5.10                                     |
| 123                      | 9.52                                        | 9186.08                                              | bdl                                                  | bdl                                                                | 9.30                | -32.22                                                            | 98.16                                    | 3.17                                     |
| 133                      | 8.45                                        | 6310.23                                              | 165.44                                               | -84.73                                                             | 9.36                | -33.77                                                            | 164.95                                   | 4.83                                     |
| 143                      | 7.77                                        | 8528.29                                              | 68.28                                                | -87.14                                                             | 10.58               | -35.21                                                            | 62.99                                    | 1.61                                     |
| 153                      | 6.31                                        | 6576.81                                              | bdl                                                  | bdl                                                                | 9.80                | -35.20                                                            | 13.21                                    | 0.39                                     |
| 163                      | 5.31                                        | 8529.26                                              | bdl                                                  | bdl                                                                | 10.46               | -36.11                                                            | 35.44                                    | 0.84                                     |
| 173                      | 5.05                                        | 7525.84                                              | 151.34                                               | -89.54                                                             | 10.44               | -36.01                                                            | 18.67                                    | 0.44                                     |
| 183                      | 4.39                                        | 8594.26                                              | 364.15                                               | -86.35                                                             | na                  | na                                                                | 13.09                                    | 0.33                                     |
| 193                      | 3.97                                        | 6812.02                                              | 189.50                                               | -91.88                                                             | 10.69               | -34.70                                                            | 17.29                                    | 0.41                                     |

|     |         |          |         |         |       |        |        |       |
|-----|---------|----------|---------|---------|-------|--------|--------|-------|
| 203 | 3.46    | 9563.97  | bdl     | bdl     | 12.77 | -37.66 | 288.06 | 7.39  |
| 213 | 3.12    | 8782.92  | 111.53  | -98.51  | 10.63 | -34.86 | na     | na    |
| 223 | 2.94    | 6275.49  | bdl     | bdl     | 10.92 | -36.14 | 34.97  | 0.78  |
| 233 | 2.40    | 8631.14  | 149.96  | -101.92 | 11.14 | -37.20 | 10.75  | 0.28  |
| 243 | 2.31    | 6901.46  | bdl     | bdl     | 11.44 | -36.21 | 11.42  | 0.46  |
| 253 | 1.40    | 5672.54  | 120.87  | -102.55 | 11.79 | -36.70 | 11.27  | 0.39  |
| 263 | 1.06    | 7749.95  | 188.85  | -105.55 | 11.31 | -36.43 | 25.92  | 0.61  |
| 273 | 1.03    | 3483.98  | 175.47  | -104.33 | 12.81 | -37.99 | 361.28 | 5.51  |
| 283 | 0.56    | 6429.07  | 263.20  | -103.76 | 11.37 | -36.69 | na     | na    |
| 293 | 0.51    | 5852.16  | 369.86  | -103.72 | na    | na     | na     | na    |
| 303 | 0.00046 | 5781.95  | 503.22  | -98.60  | 10.53 | -35.18 | 14.83  | 0.41  |
| 313 | 0.00040 | bdl      | 647.41  | -94.63  | 9.73  | -32.17 | na     | na    |
| 323 | 0.00097 | 9249.26  | 3376.94 | -86.15  | na    | na     | na     | na    |
| 333 | 0.00145 | 4768.08  | 673.33  | -103.94 | 11.64 | -34.14 | 293.25 | 2.47  |
| 343 | 0.00057 | 4875.69  | 895.83  | -96.68  | 9.75  | -31.37 | 43.90  | 2.43  |
| 353 | 0.00067 | 10345.89 | 1218.21 | -91.43  | 9.70  | -28.38 | 42.33  | 1.56  |
| 363 | 0.00076 | 3485.46  | 1521.38 | -93.22  | 9.55  | -26.51 | 20.89  | 0.96  |
| 373 | 0.00071 | 10385.61 | 1436.60 | -87.76  | 9.85  | -26.74 | na     | na    |
| 383 | 0.00075 | 5659.99  | 303.65  | -109.59 | 11.08 | -30.04 | 223.32 | 2.76  |
| 393 | 0.00051 | 1622.13  | 362.27  | -110.96 | 9.46  | -25.13 | 158.51 | 3.19  |
| 403 | 0.00049 | 2316.40  | 367.11  | -109.59 | 8.34  | -26.60 | 36.23  | 0.93  |
| 413 | 0.00041 | 2951.17  | 282.16  | -110.82 | 8.07  | -25.96 | 57.39  | 1.78  |
| 423 | 0.00055 | bdl      | 891.00  | -89.81  | 7.66  | -22.46 | 124.16 | 4.31  |
| 433 | 0.00066 | 1432.59  | 1781.18 | -69.66  | 7.10  | -21.76 | na     | na    |
| 443 | 0.00059 | 163.78   | 372.89  | -113.66 | 9.01  | -23.96 | 387.55 | 10.17 |

|     |         |         |         |         |      |        |       |      |
|-----|---------|---------|---------|---------|------|--------|-------|------|
| 453 | 0.00047 | 3757.41 | 2169.97 | -69.20  | 6.98 | -21.71 | na    | na   |
| 463 | 0.00079 | 4698.17 | 2276.94 | -52.20  | 7.12 | -21.29 | 58.22 | 2.68 |
| 473 | 0.00000 | 1984.93 | 403.82  | -106.40 | 7.93 | -23.61 | 29.90 | 1.65 |
| 483 | 0.00050 | 4520.32 | 206.61  | -55.69  | 6.95 | -21.72 | 33.22 | 1.55 |
| 493 | 0.00000 | 2808.53 | 6010.04 | -53.44  | 7.36 | -20.99 | 11.85 | 1.13 |
| 503 | 0.00000 | 1195.44 | 1848.03 | -73.63  | 7.84 | -22.68 | 40.51 | 1.13 |
| 513 | 0.00038 | 4671.57 | 1387.98 | -30.55  | 7.05 | -18.98 | na    | na   |
| 523 | bdl     | bdl     | 3002.50 | -79.00  | 7.94 | -20.22 | 19.08 | 1.94 |



99 Table S2. Sedimentary TOC (in mg/g), TOC/TN<sub>(molar)</sub>,  $\delta^{13}\text{C}_{\text{TOC}}$  (‰) and  $\delta^{15}\text{N}_{\text{TN}}$  (‰) in the 100 studied sediment core (SSD070/7/GC6). bdl= below detection limit, na= not analyzed.

| Depth (cmbsf) | Fe <sub>b</sub> (mg/g) | Fe <sub>Asc</sub> (mg/g) | TOC (mg/g) | TOC/TN (molar) | $\delta^{13}\text{C}_{\text{TOC}}$ (‰ VPDB) | Depth (cmbsf) | $\delta^{15}\text{N}_{\text{TN}}$ (‰VPDB) |
|---------------|------------------------|--------------------------|------------|----------------|---------------------------------------------|---------------|-------------------------------------------|
| 0.5           | 4.54                   | 3.11                     | 26.05      | 11.31          | -22.61                                      | 0.5           | 7.7                                       |
| 4.5           | 3.72                   | 2.20                     | 24.27      | 10.50          | -22.64                                      | 28.5          | 7.2                                       |
| 8.5           | 1.55                   | 0.93                     | 24.71      | 11.55          | -23.64                                      | 60.5          | 5.6                                       |
| 12.5          | 1.91                   | 1.49                     | 24.52      | 11.47          | -23.01                                      | 123           | 6.4                                       |
| 16.5          | 1.69                   | 1.37                     | 23.69      | 10.77          | -23.00                                      | 133           | 5.4                                       |
| 20.5          | 2.17                   | 1.48                     | 19.49      | 12.19          | -21.24                                      | 143           | 6.5                                       |
| 24.5          | 1.58                   | 1.57                     | 22.38      | 11.74          | -22.41                                      | 193           | 7.7                                       |
| 28.5          | 2.07                   | na                       | 22.53      | 10.89          | -22.48                                      | 203           | 5.5                                       |
| 32.5          | 3.78                   | 2.91                     | 22.56      | 11.62          | -21.38                                      | 213           | 5.1                                       |
| 36.5          | 2.53                   | na                       | 17.89      | 12.24          | -22.63                                      | 248.5         | 7.0                                       |
| 40.5          | 3.57                   | 2.82                     | 21.87      | 12.36          | -21.29                                      | 263           | 3.3                                       |
| 44.5          | 2.79                   | na                       | 17.66      | 9.01           | -22.60                                      | 273           | 7.0                                       |
| 48.5          | 4.21                   | 1.47                     | 20.62      | 12.64          | -21.42                                      | 283           | 4.4                                       |
| 52.5          | 2.82                   | 1.99                     | 20.08      | 11.63          | -22.45                                      | 296.5         | 7.2                                       |
| 56.5          | 2.52                   | na                       | 23.74      | 11.19          | -20.86                                      | 323           | 2.3                                       |
| 60.5          | 3.35                   | 2.52                     | 23.47      | 12.58          | -21.96                                      | 333           | 7.2                                       |
| 64.5          | 2.51                   | na                       | 20.27      | 12.63          | -20.86                                      | 353           | 3.9                                       |
| 68.5          | 1.90                   | 1.31                     | 15.94      | 9.41           | -20.83                                      | 373           | 0.2                                       |
| 72.5          | 2.50                   | na                       | 21.50      | 12.12          | -20.74                                      | 383           | -0.3                                      |
| 76.5          | 3.33                   | 1.11                     | 19.42      | 10.49          | -22.10                                      | 392.5         | -3.6                                      |

|       |      |      |       |       |        |       |      |
|-------|------|------|-------|-------|--------|-------|------|
| 80.5  | 2.82 | na   | 19.77 | 12.27 | -20.92 | 408.3 | -0.1 |
| 84.5  | 3.69 | 3.17 | 19.84 | 12.70 | -20.77 | 433   | 2.5  |
| 88.5  | 2.44 | na   | 20.14 | 13.20 | -20.69 | 443   | 0.3  |
| 92.5  | 2.79 | 1.72 | 18.58 | 12.32 | -20.70 | 453   | 1.6  |
| 96.5  | 5.92 | na   | 22.25 | 11.57 | -21.87 | 472.5 | -0.3 |
| 100.5 | 1.04 | 1.00 | 21.86 | 12.77 | -20.95 | 492.5 | 0.6  |
| 104.5 | 3.24 | na   | 20.92 | 12.76 | -21.75 | 504.5 | 3.6  |
| 116.5 | 3.03 | 0.84 | 18.75 | 13.31 | -21.54 | 523.5 | 1.0  |
| 120.5 | 5.56 | na   | 11.71 | 8.20  | -21.24 |       |      |
| 124.5 | 1.92 | 1.07 | 13.78 | 9.78  | -21.31 |       |      |
| 133   | 1.53 | 0.28 | 25.41 | 10.50 | -21.37 |       |      |
| 136.5 | 1.40 | 0.77 | 19.78 | na    | -21.36 |       |      |
| 140.5 | 3.15 | 0.78 | 23.45 | 14.04 | -21.23 |       |      |
| 144.5 | 1.16 | na   | 21.30 | 14.55 | -21.62 |       |      |
| 148.5 | 2.80 | 1.52 | 10.66 | 13.13 | -21.45 |       |      |
| 153.5 | 2.11 | na   | 13.06 | 13.97 | -22.14 |       |      |
| 156.5 | 2.03 | 0.68 | 20.90 | 15.43 | -22.45 |       |      |
| 160.5 | 1.07 | na   | 24.01 | 13.11 | -24.20 |       |      |
| 164.5 | 3.30 | 0.70 | 27.16 | na    | -22.55 |       |      |
| 168.5 | 3.52 | 1.56 | 25.45 | 16.37 | -22.79 |       |      |
| 172.5 | 1.77 | 1.03 | 19.59 | 17.02 | -22.48 |       |      |
| 176.5 | 1.34 | 0.57 | 18.33 | 16.27 | -22.32 |       |      |
| 180.5 | 1.86 | 0.72 | 29.60 | 19.39 | -22.05 |       |      |
| 184.5 | 4.32 | 1.07 | 20.67 | 15.03 | -23.45 |       |      |
| 188.5 | 3.96 | 1.61 | 25.35 | 21.41 | -23.38 |       |      |

|       |      |      |       |       |        |  |  |
|-------|------|------|-------|-------|--------|--|--|
| 192.5 | 2.53 | na   | 16.34 | 12.30 | -22.70 |  |  |
| 196.5 | 2.90 | 1.14 | 18.01 | 22.01 | -23.78 |  |  |
| 200.5 | 1.54 | 0.59 | 22.68 | 19.98 | -20.98 |  |  |
| 203   | 2.50 | 0.27 | 19.48 | 16.05 | -24.19 |  |  |
| 208.5 | 2.17 | na   | 17.36 | 13.77 | -22.69 |  |  |
| 212.5 | 2.37 | 1.10 | 17.54 | 16.92 | -22.95 |  |  |
| 216.5 | 2.12 | 1.23 | 14.61 | 12.90 | -23.16 |  |  |
| 220.5 | 2.12 | 0.92 | 25.43 | 16.98 | -23.66 |  |  |
| 223   | 1.92 | 0.53 | 21.89 | 16.94 | -23.08 |  |  |
| 228.5 | 1.40 | 0.59 | 22.58 | 17.37 | -23.02 |  |  |
| 232.5 | 3.04 | na   | 22.28 | na    | -23.07 |  |  |
| 236.5 | 2.65 | 1.10 | 23.28 | na    | -24.34 |  |  |
| 240.5 | 2.45 | 0.01 | 16.51 | 15.12 | -22.82 |  |  |
| 244.5 | 4.18 | 0.77 | 18.54 | 14.77 | -22.88 |  |  |
| 248.5 | 2.42 | na   | 14.17 | 12.53 | na     |  |  |
| 252.5 | 3.39 | 0.43 | 12.52 | 10.65 | -22.73 |  |  |
| 256.5 | 2.77 | 0.37 | 16.62 | 14.32 | -22.71 |  |  |
| 260.5 | 2.61 | 0.35 | 12.34 | 14.54 | -23.01 |  |  |
| 264.5 | 3.68 | na   | 16.02 | 14.38 | -23.16 |  |  |
| 268.5 | 3.14 | 1.87 | 11.87 | 13.26 | -23.96 |  |  |
| 272.5 | 1.60 | 0.32 | 13.69 | 13.86 | -24.65 |  |  |
| 276.5 | 2.70 | 0.32 | 18.61 | 15.02 | -22.56 |  |  |
| 280.5 | 0.54 | na   | 15.10 | 13.85 | -22.87 |  |  |
| 284.5 | 3.45 | 0.38 | 15.39 | 14.04 | -23.29 |  |  |
| 288.5 | 0.87 | 0.21 | 16.74 | 15.72 | -22.83 |  |  |

|       |      |      |       |       |        |  |  |
|-------|------|------|-------|-------|--------|--|--|
| 293   | 2.27 | na   | 14.56 | 15.27 | -22.67 |  |  |
| 300.5 | 2.73 | 0.94 | 20.63 | 20.48 | -23.58 |  |  |
| 303   | 3.21 | 1.77 | 17.13 | 17.07 | -23.66 |  |  |
| 304.5 | 1.40 | na   | 19.35 | 20.28 | na     |  |  |
| 308.5 | 4.30 | 0.54 | 16.12 | 17.23 | -23.84 |  |  |
| 312.5 | 3.97 | na   | 15.77 | 15.83 | -23.07 |  |  |
| 316.5 | 5.77 | na   | 12.70 | bdl   | -23.05 |  |  |
| 323   | 2.83 | na   | 14.62 | 14.99 | -23.09 |  |  |
| 324.5 | 3.59 | 1.91 | 10.91 | 14.62 | na     |  |  |
| 328.5 | 3.07 | na   | 31.30 | bdl   | -22.95 |  |  |
| 333   | 1.74 | 0.46 | 11.35 | 11.33 | -23.36 |  |  |
| 336.5 | 3.14 | 0.82 | 19.31 | 20.39 | -22.91 |  |  |
| 340.5 | 0.96 | 0.84 | 13.69 | 13.69 | -22.82 |  |  |
| 344.5 | 0.70 | na   | 11.36 | 18.63 | -22.90 |  |  |
| 348.5 | 1.25 | 0.39 | 15.93 | 15.53 | -22.93 |  |  |
| 352.5 | 5.38 | 0.47 | 15.32 | 15.59 | na     |  |  |
| 356.5 | 3.13 | 0.57 | 15.04 | 16.97 | -22.68 |  |  |
| 360.5 | 2.54 | na   | 4.65  | 4.95  | -22.37 |  |  |
| 364.5 | 4.86 | 0.71 | 16.06 | bdl   | -24.30 |  |  |
| 368.5 | 3.66 | na   | 7.97  | 14.91 | -22.72 |  |  |
| 373   | 2.05 | 0.33 | na    | na    | -22.27 |  |  |
| 376.5 | 4.83 | na   | 12.97 | bdl   | -23.68 |  |  |
| 380.5 | 5.84 | 1.68 | 9.79  | 14.64 | -22.87 |  |  |
| 383   | 4.40 | 0.47 | 9.68  | 14.51 | -25.21 |  |  |
| 388.5 | 4.02 | 1.30 | 4.86  | 6.80  | -23.52 |  |  |

|       |      |      |       |       |        |  |  |
|-------|------|------|-------|-------|--------|--|--|
| 393   | 5.12 | 0.52 | 12.22 | 20.87 | -23.06 |  |  |
| 396.5 | 4.02 | 2.24 | 4.77  | bdl   | -25.66 |  |  |
| 400.5 | 1.74 | na   | 3.16  | 7.10  | -23.50 |  |  |
| 404.5 | 2.00 | 0.83 | 1.45  | 3.47  | -22.86 |  |  |
| 408.5 | 2.02 | na   | 8.03  | 16.81 | -22.99 |  |  |
| 412.5 | 4.51 | 1.16 | 9.85  | bdl   | -23.19 |  |  |
| 416.5 | 3.56 | 1.99 | 9.12  | 12.23 | -24.40 |  |  |
| 420.5 | 1.79 | 0.92 | 9.35  | 13.36 | -23.15 |  |  |
| 424.5 | 3.13 | 1.33 | 13.04 | 15.54 | -23.72 |  |  |
| 428.5 | 4.67 | 3.33 | 12.79 | 18.07 | na     |  |  |
| 432.5 | 4.12 | na   | 15.27 | 18.04 | -25.10 |  |  |
| 436.5 | 5.17 | 3.33 | 12.21 | 16.73 | -23.77 |  |  |
| 440.5 | 3.88 | na   | 12.78 | 16.20 | -24.94 |  |  |
| 443   | 3.38 | 1.18 | 12.89 | 10.83 | -25.93 |  |  |
| 448.5 | 4.01 | na   | 14.49 | 16.14 | -25.43 |  |  |
| 452.5 | 3.37 | 2.84 | 13.95 | 17.29 | -24.97 |  |  |
| 456.5 | 2.30 | na   | 12.66 | 16.33 | -25.06 |  |  |
| 460.5 | 4.99 | 1.47 | 13.68 | 18.14 | -23.95 |  |  |
| 463   | 6.03 | 0.31 | 14.95 | 15.90 | -24.86 |  |  |
| 468.5 | 2.42 | 1.24 | 10.80 | 27.32 | -23.90 |  |  |
| 473   | 4.27 | 0.63 | 14.37 | 18.14 | na     |  |  |
| 476.5 | 2.01 | 0.68 | 15.48 | 20.26 | -23.94 |  |  |
| 479.5 | 3.97 | na   | 12.36 | 14.69 | -24.81 |  |  |
| 484.5 | 1.41 | 0.40 | 17.54 | 19.03 | -24.04 |  |  |
| 488.5 | 0.82 | na   | 13.88 | 18.28 | -25.21 |  |  |

|       |      |      |       |       |        |  |  |
|-------|------|------|-------|-------|--------|--|--|
| 492.5 | 4.34 | 0.45 | 14.90 | 16.97 | -23.66 |  |  |
| 496.5 | 1.20 | na   | 9.58  | 11.79 | -24.42 |  |  |
| 500.5 | 3.47 | 2.87 | 14.95 | 16.31 | -23.91 |  |  |
| 503   | 4.15 | 0.51 | 14.61 | 14.66 | -24.95 |  |  |
| 510.5 | 6.48 | 4.27 | 9.72  | 14.38 | -24.50 |  |  |
| 514.5 | 6.68 | na   | 12.48 | 12.97 | -24.01 |  |  |
| 517.5 | 7.18 | 1.30 | 13.62 | 16.71 | na     |  |  |
| 523   | 4.25 | 0.59 | 10.01 | 14.67 | -24.41 |  |  |
| 524.5 | 3.21 | 1.2  | 16.13 | 19.92 | -24.46 |  |  |

102 **Table S3.** Proportion of metagenomic reads from individual sediment samples of SSK42/9 matching sequences from *Candidatus* Methanoperedens  
 103 genomes.  
 104

| Sediment-depth from where metagenomes were sequenced (cmbsf) | BioSample accession number of the metagenome | Sample fraction of the metagenome | Run accession number for the sample fraction | <i>Candidatus</i> Methanoperedens genome GCA_003104905.1 |                                                                   | <i>Candidatus</i> Methanoperedens genome GCA_001317315.1 |                                                                   |
|--------------------------------------------------------------|----------------------------------------------|-----------------------------------|----------------------------------------------|----------------------------------------------------------|-------------------------------------------------------------------|----------------------------------------------------------|-------------------------------------------------------------------|
|                                                              |                                              |                                   |                                              | Percentage of metagenomic reads mapping* onto the genome | Percentage of the genome covered by the mapped* metagenomic reads | Percentage of metagenomic reads mapping* onto the genome | Percentage of the genome covered by the mapped* metagenomic reads |
| 0                                                            | SAMN0444223<br>3                             | 1st replicate                     | SRR3872933                                   | 0.01                                                     | 0.52                                                              | 0.01                                                     | 0.52                                                              |
|                                                              |                                              | 2nd replicate                     | SRR3872934                                   |                                                          |                                                                   |                                                          |                                                                   |
| 19                                                           | SAMN0444223<br>6                             | 1st replicate                     | SRR3884351                                   | 0.02                                                     | 0.59                                                              | 0.02                                                     | 0.59                                                              |
|                                                              |                                              | 2nd replicate                     | SRR3884355                                   |                                                          |                                                                   |                                                          |                                                                   |
| 50                                                           | SAMN0444223<br>8                             | 1st replicate                     | SRR3884357                                   | 0.03                                                     | 0.45                                                              | 0.03                                                     | 0.45                                                              |
|                                                              |                                              | 2nd replicate                     | SRR3884359                                   |                                                          |                                                                   |                                                          |                                                                   |
| 115                                                          | SAMN0444224<br>1                             | 1st replicate                     | SRR3884468                                   | 0.03                                                     | 0.24                                                              | 0.03                                                     | 0.24                                                              |
|                                                              |                                              | 2nd replicate                     | SRR3884472                                   |                                                          |                                                                   |                                                          |                                                                   |
| 125                                                          | SAMN0444224<br>2                             | 1st replicate                     | SRR3884479                                   | 0.03                                                     | 0.51                                                              | 0.03                                                     | 0.51                                                              |
|                                                              |                                              | 2nd replicate                     | SRR3884488                                   |                                                          |                                                                   |                                                          |                                                                   |
| 145                                                          | SAMN0444224<br>4                             | 1st replicate                     | SRR3884538                                   | 0.03                                                     | 0.43                                                              | 0.03                                                     | 0.43                                                              |
|                                                              |                                              | 2nd replicate                     | SRR3884540                                   |                                                          |                                                                   |                                                          |                                                                   |
| 155                                                          | SAMN0444224<br>5                             | 1st replicate                     | SRR3884542                                   | 0.03                                                     | 0.47                                                              | 0.03                                                     | 0.47                                                              |
|                                                              |                                              | 2nd replicate                     | SRR3884544                                   |                                                          |                                                                   |                                                          |                                                                   |
| 180                                                          | SAMN0444224<br>6                             | 1st replicate                     | SRR3884546                                   | 0.03                                                     | 0.40                                                              | 0.03                                                     | 0.40                                                              |
|                                                              |                                              | 2nd replicate                     | SRR3884547                                   |                                                          |                                                                   |                                                          |                                                                   |
| 225                                                          | SAMN0444224<br>8                             | 1st replicate                     | SRR3884548                                   | 0.03                                                     | 0.48                                                              | 0.03                                                     | 0.48                                                              |
|                                                              |                                              | 2nd replicate                     | SRR3884552                                   |                                                          |                                                                   |                                                          |                                                                   |
| 255                                                          | SAMN0444225<br>0                             | 1st replicate                     | SRR3884553                                   | 0.03                                                     | 0.61                                                              | 0.03                                                     | 0.61                                                              |
|                                                              |                                              | 2nd replicate                     | SRR3884554                                   |                                                          |                                                                   |                                                          |                                                                   |

105

106 \* The duplicate metagenomic datasets available for each sediment sample were merged and reads were matched with sequences from the  
 107 Methanoperedens genomes using the short-read alignment software Bowtie2 v2.2.5 (Langmead et al., 2012) with default parameter.

108 Two species-level entities affiliated to the uncultivated archaeon *Candidatus Methanoperedens*  
109 have been reported thus far for potential abilities to harness anaerobic methane oxidation to the  
110 reduction of Fe (III) (Ettwig et al., 2016; Cai et al., 2018). When the metagenomes sequenced  
111 along a ~3 m sediment core (SSK42/9) collected from the shallow seasonal hypoxic zone of  
112 the west coast of India (water depth: 31 m; GPS coordinates: 16°13.56' N and 73°19.16' E) were  
113 searched for signatures corresponding to sequences from the two *Candidatus Methanoperedens*  
114 genomes available in the GenBank (assembly numbers GCA\_003104905.1 and  
115 GCA\_001317315.1), 0.01% to 0.03% of reads from the individual metagenomic datasets of  
116 SSK42/9 mapped onto each of the genome with coverage breadth ranges from 0.24% to 0.61%  
117 (Table S3). The genome-metagenome correspondence data from SSK42/9 highlighted the  
118 presence of *Methanoperedens*-like archaea in the sulfidic coastal sediments of Eastern Arabian  
119 Sea (west coast of India).

## 120 **References**

### 121 **References for Figure 1a in the main text**

- 122 Aromokeye, D. A., Kulkarni, A. C., Elvert, M., Wegener, G., Henkel, S., Coffinet, S.,  
123 Eickhorst, T., Oni, O. E., Richter-Heitmann, T., and Schnakenberg, A.: Rates and microbial  
124 players of iron-driven anaerobic oxidation of methane in methanic marine sediments, *Frontiers*  
125 *in Microbiology*, 10, 3041, <https://doi.org/10.3389/fmicb.2019.03041>, 2019.
- 126 Beal, E. J., House, C. H., and Orphan, V. J.: Manganese- and iron-dependent marine methane  
127 oxidation, *Science*, 325, 184-187, <https://doi.org/10.1126/science.1169984>, 2009.
- 128 Egger, M., Rasigraf, O., Sapart, C. J., Jilbert, T., Jetten, M. S. M., Rockmann, T., Van der Veen,  
129 C., Banda, N., Kartal, B., and Ettwig, K. F.: Iron-mediated anaerobic oxidation of methane in  
130 brackish coastal sediments, *Environmental science & technology*, 49, 277-283,  
131 <https://doi.org/10.1021/es503663z>, 2015a.



132 Egger, M., Jilbert, T., Behrends, T., Rivard, C., and Slomp, C. P.: Vivianite is a major sink for  
133 phosphorus in methanogenic coastal surface sediments, *Geochimica et Cosmochimica Acta*,  
134 169, 217-235, <https://doi.org/10.1016/j.gca.2015.09.012>, 2015b.

135 Egger, M., Kraal, P., Jilbert, T., Sulu-Gambari, F., Sapart, C. J., Röckmann, T., and Slomp, C.  
136 P.: Anaerobic oxidation of methane alters sediment records of sulfur, iron and phosphorus in  
137 the Black Sea, *Biogeosciences*, <https://doi.org/10.5194/bg-13-5333-2016>, 2016a.

138 Egger, M., Lenstra, W., Jong, D., Meysman, F. J. R., Sapart, C. I. J., Van der Veen, C.,  
139 Röckmann, T., Gonzalez, S., and Slomp, C. P.: Rapid sediment accumulation results in high  
140 methane effluxes from coastal sediments, *PloS one*, 11, e0161609,  
141 <https://doi.org/10.1371/journal.pone.0161609>, 2016b.

142 Egger, M., Hagens, M., Sapart, C. I. J., Dijkstra, N., van Helmond, N. A. G. M., Mogoll<sup>3</sup>n, J.  
143 M., Risgaard-Petersen, N., van der Veen, C., Kasten, S., and Riedinger, N.: Iron oxide reduction  
144 in methane-rich deep Baltic Sea sediments, *Geochimica et Cosmochimica Acta*, 207, 256-276,  
145 <https://doi.org/10.1016/j.gca.2017.03.019>, 2017.

146 Li, J., Li, L., Bai, S., Ta, K., Xu, H., Chen, S., Pan, J., Li, M., Du, M., and Peng, X.: New insight  
147 into the biogeochemical cycling of methane, S and Fe above the Sulfate-Methane Transition  
148 Zone in methane hydrate-bearing sediments: A case study in the Dongsha area, South China  
149 Sea, *Deep Sea Research Part I: Oceanographic Research Papers*, 145, 97-108,  
150 <https://doi.org/10.1016/j.dsr.2019.01.011>, 2019.

151 Luo, M., Torres, M. E., Hong, W.-L., Pape, T., Fronzek, J., Kutterolf, S., Mountjoy, J. J., Orpin,  
152 A., Henkel, S., and Huhn, K.: Impact of iron release by volcanic ash alteration on carbon  
153 cycling in sediments of the northern Hikurangi margin, *Earth and Planetary Science Letters*,  
154 541, 116288, <https://doi.org/10.1016/j.epsl.2020.116288>, 2020.

155 Oni, O., Miyatake, T., Kasten, S., Richter-Heitmann, T., Fischer, D., Wagenknecht, L.,  
156 Kulkarni, A., Blumers, M., Shylin, S. I., and Ksenofontov, V.: Distinct microbial populations  
157 are tightly linked to the profile of dissolved iron in the methanic sediments of the Helgoland  
158 mud area, North Sea, *Frontiers in Microbiology.*, 6, 365, [https://doi.org/10.3389/fmicb.](https://doi.org/10.3389/fmicb.2015.00365)  
159 2015.00365, 2015.

160 Orphan, V. J., Ussler Iii, W., Naehr, T. H., House, C. H., Hinrichs, K. U., and Paull, C. K.:  
161 Geological, geochemical, and microbiological heterogeneity of the seafloor around methane  
162 vents in the Eel River Basin, offshore California, *Chemical Geology*, 205, 265-289,  
163 <https://doi.org/10.1016/j.chemgeo.2003.12.035>, 2004.

164 Riedinger, N., Formolo, M. J., Lyons, T. W., Henkel, S., Beck, A., and Kasten, S.: An inorganic  
165 geochemical argument for coupled anaerobic oxidation of methane and iron reduction in marine  
166 sediments, *Geobiology*, <https://doi.org/10.1111/gbi.12077>, 2014.

167 Scheller, S., Yu, H., Chadwick, G. L., McGlynn, S. E., and Orphan, V. J.: Artificial electron  
168 acceptors decouple archaeal methane oxidation from sulfate reduction, *Science*, 351, 703-707,  
169 <https://doi.org/10.1126/science.aad7154>, 2016.

170 Slomp, C. P., Mort, H. P., Jilbert, T., Reed, D. C., Gustafsson, B. G., and Wolthers, M.: Coupled  
171 dynamics of iron and phosphorus in sediments of an oligotrophic coastal basin and the impact  
172 of anaerobic oxidation of methane, *PloS one*, 8, e62386, <https://doi.org/10.1371/journal.pone.0062386>, 2013.

174 Wankel, S. D., Adams, M. M., Johnston, D. T., Hansel, C. M., Joye, S. B., and Girguis, P. R.:  
175 Anaerobic methane oxidation in metalliferous hydrothermal sediments: influence on carbon  
176 flux and decoupling from sulfate reduction, *Environmental microbiology*, 14, 2726-2740,  
177 <https://doi.org/10.1111/j.1462-2920.2012.02825.x>, 2012.

178 Xiao, X., Luo, M., Zhang, C., Zhang, T., Yin, X., Wu, X., Zhao, J., Tao, J., Chen, Z., and  
179 Liang, Q.: Metal-driven anaerobic oxidation of methane as an important methane sink in  
180 methanic cold seep sediments, *Microbiology Spectrum*, 11, e05337-05322,  
181 <https://doi.org/10.1128/spectrum.05337-22>, 2023.

182

### 183 **Other References**

184

185 Cai, C., Leu, A. O., Xie, G.-J., Guo, J., Feng, Y., Zhao, J.-X., Tyson, G. W., Yuan, Z., and Hu,  
186 S.: A methanotrophic archaeon couples anaerobic oxidation of methane to Fe (III) reduction,  
187 *The ISME Journal*, 12, 1929-1939, <https://doi.org/10.1038/s41396-018-0109-x>, 2018.

188

189 Ettwig, K. F., Zhu, B., Speth, D., Keltjens, J. T., Jetten, M. S. M., and Kartal, B.: Archaea  
190 catalyze iron-dependent anaerobic oxidation of methane, *Proceedings of the National Academy*  
191 *of Sciences of the United States of America*, 113, 12792-12796, [https://doi.org/10.1073/pnas.-](https://doi.org/10.1073/pnas.1609534113)  
192 1609534113, 2016.

193

194 Fernandes, S., Mazumdar, A., Peketi, A., Anand, S. S., Rengarajan, R., Jose, A., Manaskanya,  
195 A., Carvalho, M. A., and Shetty, D.: Sulfidization processes in seasonally hypoxic shelf  
196 sediments: a study off the West coast of India, *Marine and Petroleum Geology*, 117, 104353,  
197 <https://doi.org/10.1016/j.marpetgeo.2020.104353>, 2020.

198 Hensen, C., Zabel, M., Pfeifer, K., Schwenk, T., Kasten, S., Riedinger, N., Schulz, H., and  
199 Boetius, A.: Control of sulfate pore-water profiles by sedimentary events and the significance  
200 of anaerobic oxidation of methane for the burial of sulfur in marine sediments, *Geochimica et*  
201 *Cosmochimica Acta*, 67, 2631-2647, [https://doi.org/10.1016/S0016-7037\(03\)00199-6](https://doi.org/10.1016/S0016-7037(03)00199-6), 2003.

202

203 Karisiddaiah, S., Veerayya, M., and Vora, K.: Seismic and sequence stratigraphy of the central  
204 western continental margin of India: late-Quaternary evolution, *Marine Geology*, 192, 335-353,  
205 [https://doi.org/10.1016/S0025-3227\(02\)00591-1](https://doi.org/10.1016/S0025-3227(02)00591-1), 2002.

206

207 Kurian, S., Agnihotri, R., Borole, D. V., Naqvi, S., Ferreira, A. M., and Vale, C.: Possible solar  
208 control on primary production along the Indian west coast on decadal to centennial timescale,  
209 *Journal of Quaternary Science*, 24, 109-116, <https://doi.org/10.1002/jqs.1193>, 2009.

210

211 Langmead, B. and Salzberg, S. L.: Fast gapped-read alignment with Bowtie 2, *Nature methods*,  
212 9, 357-359, <https://doi.org/10.1038/nmeth.1923>, 2012.

213

214 Mazumdar, A., Peketi, A., Joao, H., Dewangan, P., Borole, D. V., and Kocherla, M.:  
215 Sulfidization in a shallow coastal depositional setting: Diagenetic and palaeoclimatic  
216 implications, *Chemical Geology*, 322, 68-78, <https://doi.org/10.1016/j.chemgeo.2012.06.005>,  
217 2012.

218

219 Nair, R. R., Hashimi, N. H., Kidwai, R. M., Guptha, M. V. S., Paropkari, A. L., Ambre, N. V.,  
220 Muralinath, A. S., Mascarenhas, A., and D'Costa, G. P.: Topography and sediments of the  
221 western continental shelf of India-Vengurla to Mangalore, 1978.

222 Naqvi, S., Jayakumar, D., Narvekar, P., Naik, H., Sarma, V., D'Souza, W., Joseph, S., and  
223 George, M.: Increased marine production of N<sub>2</sub>O due to intensifying anoxia on the Indian  
224 continental shelf, *Nature*, 408, 346-349, <https://doi.org/10.1038/35042551>, 2000.

225 Naqvi, S. W. A., Naik, H., Jayakumar, D., Shailaja, M., and Narvekar, P.: Seasonal oxygen  
226 deficiency over the western continental shelf of India, Past and present water column anoxia,  
227 195-224, [https://doi.org/10.1007/1-4020-4297-3\\_08](https://doi.org/10.1007/1-4020-4297-3_08), 2006.

228

229 Nigam, R., Khare, N., and Nair, R.: Foraminiferal evidences for 77-year cycles of droughts in  
230 India and its possible modulation by the gleissberg solar cycle, *Journal of Coastal Research*,  
231 11, 1099-1107, <https://www.jstor.org/stable/4298414>, 1995.

232

233 Rao, V. P. and Nair, R. R.: Microbial origin of the phosphorites of the western continental shelf  
234 of India, *Marine Geology*, 84, 105-110, [https://doi.org/10.1016/0025-3227\(88\)90128-4](https://doi.org/10.1016/0025-3227(88)90128-4), 1988.

235

236 Rao, V. P. and Wagle, B.: Geomorphology and surficial geology of the western  
237 continental shelf and slope of India: A review, *Current Science*, 73, 330-350p,  
238 <https://www.jstor.org/stable/24100364>, 1997.

239

240 Sebastian, T., Nath, B. N., Naik, S., Borole, D. V., Pierre, S., and Yazing, A. K.: Offshore  
241 sediments record the history of onshore iron ore mining in Goa State, India, *Marine Pollution*  
242 *Bulletin*, 114, 805-815, <https://doi.org/10.1016/j.marpolbul.2016.10.075>, 2017.

243

244 Siddiquie, H., Rao, D. G., Vora, K., and Topgi, R.: Acoustic masking in sediments due to gases  
245 on the western continental shelf of India, *Marine Geology*, 39, M27-M37,  
246 [https://doi.org/10.1016/0025-3227\(81\)90023-2](https://doi.org/10.1016/0025-3227(81)90023-2), 1981.

247

248 Wagle, B., Vora, K., Karisiddaiah, S., Veerayya, M., and Almeida, F.: Holocene submarine  
249 terraces on the western continental shelf of India; Implications for sea-level changes, *Marine*  
250 *Geology*, 117, 207-225, [https://doi.org/10.1016/0025-3227\(94\)90016-7](https://doi.org/10.1016/0025-3227(94)90016-7), 1994.
